# Supplementary material
Source: PubMed Central journal article supplement (PMC5546240)
Supplement: NIHMS881829-supplement-Supp_info.pdf [file NIHMS881829-supplement-Supp_info.pdf]

## VapC Toxins Drive Cellular Dormancy under Uranium Stress for the Extreme Thermoacidophile *Metallosphaera prunae*

---

A. Mukherjee, G.H. Wheaton, B. Ijeomah, J.A. Counts, J. Desai, and R.M. Kelly

### SUPPLEMENTARY INFORMATION

| Figure    | Contents                                                                      |
|-----------|-------------------------------------------------------------------------------|
| <b>S1</b> | Initial RNase activity screen of VapC toxins and PIN domain proteins          |
| <b>S2</b> | RNase activity of total RNA degrading VapC toxins                             |
| <b>S3</b> | Predicted secondary structure of <i>M. sedula</i> / <i>M. prunae</i> 16S rRNA |
| <b>S4</b> | Predicted secondary structure of Msed_1804                                    |
| <b>S5</b> | Predicted secondary structure of Msed_1802                                    |
| <b>S6</b> | Predicted secondary structure of Msed_0355                                    |

| Table      | Contents                                                                                |
|------------|-----------------------------------------------------------------------------------------|
| <b>S1</b>  | RNase activity of total RNA degrading VapC toxins                                       |
| <b>S2</b>  | <i>M. sedula</i> genes and occurrence of consensus motifs (Supplemental Excel Workbook) |
| <b>S3</b>  | Base-Pairing Probabilities for <i>M. sedula</i> 16S rRNA                                |
| <b>S4</b>  | Base-Pairing Probabilities for Msed_1804                                                |
| <b>S5</b>  | Base-Pairing Probabilities for Msed_1802                                                |
| <b>S6</b>  | Base-Pairing Probabilities for Msed_0355                                                |
| <b>S7</b>  | Primers and Ek/LIC vectors used for cloning VapC toxins and PIN domain proteins         |
| <b>S8</b>  | Primers used for cloning VapB anti-toxins into pET-46 vector                            |
| <b>S9</b>  | MS2 bacteriophage primer name, sequence and location adapted from Zhu et. al. (2008)    |
| <b>S10</b> | Primers used in messenger RNA degradation assays                                        |

**Table S1. RNase activity of total RNA degrading VapC proteins on the generic RNA substrate (IDT DNA).** Activity was obtained by calculating initial reaction velocity (increase in fluorescence reading over time). The 'no VapC added' control fluorescence was subtracted from the EDTA, VapBC and VapC data prior to determination of initial reaction velocity. Further, the EDTA, VapBC and VapC initial reaction velocities were divided by the VapC loading. The VapC4 and VapC8 loading was 0.01 $\mu$ g while VapC7 was 0.001 $\mu$ g. The VapC:VapB mass ratio was 1:2 for all VapCs. 25 mM EDTA + VapC (EDTA); VapB + VapC (VapBC); Biological replicate #1 VapC (VapC-1); Biological replicate #2 VapC (VapC-2).

| VapC                                                                          | EDTA<br>(RFU/ $\mu$ g·min)  | VapBC<br>(RFU/ $\mu$ g·min) | VapC-1<br>(RFU/ $\mu$ g·min) | VapC-2<br>(RFU/ $\mu$ g·min) |
|-------------------------------------------------------------------------------|-----------------------------|-----------------------------|------------------------------|------------------------------|
| VapC4                                                                         | -2.17E+03 $\pm$<br>1.54E+2  | -1.09E+02 $\pm$<br>1.50E+02 | 1.07E+04 $\pm$<br>2.21E+02   | 3.09E+04 $\pm$<br>2.74E+02   |
| VapC7                                                                         | -2.55E+04 $\pm$<br>1.62E+03 | -3.37E+03 $\pm$<br>1.72E+03 | 2.60E+05 $\pm$<br>2.97E+03   | 1.68E+05 $\pm$<br>1.62E+03   |
| VapC8*                                                                        | -2.33E+03 $\pm$<br>2.13E+02 | 2.30E+01 $\pm$<br>2.38E+02  | 2.57E+04 $\pm$<br>2.62E+02   | 2.60E+04 $\pm$<br>2.58E+02   |
| (*) The activity of VapC8 when treated with VapB4 was 2.25E+02 $\pm$ 2.00E+02 |                             |                             |                              |                              |

**Table S3. Base-Pairing Probabilities for *M. sedula*/*M. prunae* 16S rRNA.**  
Sequence displayed 5' → 3'

|     |     |     |     |     |   |   |   |   |   |   |   |   |   |   |   |   |   |   |   |   |   |   |   |   |   |   |   |   |   |   |   |   |   |   |   |   |   |   |   |
|-----|-----|-----|-----|-----|---|---|---|---|---|---|---|---|---|---|---|---|---|---|---|---|---|---|---|---|---|---|---|---|---|---|---|---|---|---|---|---|---|---|---|
| 1   | 10  | 20  | 30  | 40  |   |   |   |   |   |   |   |   |   |   |   |   |   |   |   |   |   |   |   |   |   |   |   |   |   |   |   |   |   |   |   |   |   |   |   |
| C   | U   | G   | C   | C   | C | U | A | A | U | U | C | C | G | G | U | U | G | A | U | C | C | U | G | C | C | G | G | A | C | C | G | A | U | C | G | C | U | A |   |
| 41  | 50  | 60  | 70  | 80  |   |   |   |   |   |   |   |   |   |   |   |   |   |   |   |   |   |   |   |   |   |   |   |   |   |   |   |   |   |   |   |   |   |   |   |
| U   | A   | G   | G   | G   | G | U | A | G | G | C | G | C | U | A | A | G | C | C | A | U | G | G | G | A | G | U | C | G | U | A | C | G | C | U | C | G | G | G | G |
| 81  | 90  | 100 | 110 | 120 |   |   |   |   |   |   |   |   |   |   |   |   |   |   |   |   |   |   |   |   |   |   |   |   |   |   |   |   |   |   |   |   |   |   |   |
| A   | A   | G   | A   | G   | G | G | C | G | U | G | G | C | G | A | C | C | G | C | U | G | A | G | U | A | A | C | A | C | G | U | G | G | C | U | A | A | C | C |   |
| 121 | 130 | 140 | 150 | 160 |   |   |   |   |   |   |   |   |   |   |   |   |   |   |   |   |   |   |   |   |   |   |   |   |   |   |   |   |   |   |   |   |   |   |   |
| U   | G   | C   | C   | C   | U | U | G | G | C | A | U | C | U | G | G | A | U | A | A | C | C | C | C | G | G | G | A | A | A | C | U | G | G | G | G | C | U | A | A |
| 161 | 170 | 180 | 190 | 200 |   |   |   |   |   |   |   |   |   |   |   |   |   |   |   |   |   |   |   |   |   |   |   |   |   |   |   |   |   |   |   |   |   |   |   |
| U   | C   | C   | G   | G   | A | G | C | G | G | C | A | A | G | G | G | A | U | C | U | G | G | A | A | U | G | A | U | U | C | U | C | U | G | C | C | U | A |   |   |
| 201 | 210 | 220 | 230 | 240 |   |   |   |   |   |   |   |   |   |   |   |   |   |   |   |   |   |   |   |   |   |   |   |   |   |   |   |   |   |   |   |   |   |   |   |
| A   | A   | A   | G   | C   | C | U | C | U | C | G | G | C | U | G | A | U | C | C | G | U | C | G | A | G | A | G | G | C | G | C | C | A | A | G | G | A | U |   |   |
| 241 | 250 | 260 | 270 | 280 |   |   |   |   |   |   |   |   |   |   |   |   |   |   |   |   |   |   |   |   |   |   |   |   |   |   |   |   |   |   |   |   |   |   |   |
| G   | G   | G   | G   | C   | U | G | C | G | G | C | C | C | A | U | C | A | G | G | C | U | G | U | U | G | G | G | G | A | G | U | A | A | A | G | G | U | C |   |   |
| 281 | 290 | 300 | 310 | 320 |   |   |   |   |   |   |   |   |   |   |   |   |   |   |   |   |   |   |   |   |   |   |   |   |   |   |   |   |   |   |   |   |   |   |   |
| C   | C   | C   | A   | A   | A | C | C | G | A | U | A | A | C | G | G | G | U | A | C | G | G | C | C | G | U | G | G | A | G | C | G | G | G | A | G | C | C |   |   |
| 321 | 330 | 340 | 350 | 360 |   |   |   |   |   |   |   |   |   |   |   |   |   |   |   |   |   |   |   |   |   |   |   |   |   |   |   |   |   |   |   |   |   |   |   |
| C   | C   | C   | A   | G   | U | U | G | G | G | C | A | C | U | G | A | G | A | C | A | A | G | G | C | C | C | A | G | G | C | C | C | A | G | G | C | C | C | C |   |
| 361 | 370 | 380 | 390 | 400 |   |   |   |   |   |   |   |   |   |   |   |   |   |   |   |   |   |   |   |   |   |   |   |   |   |   |   |   |   |   |   |   |   |   |   |
| C   | G   | C   | A   | C   | C | A | G | A | G | G | C | G | A | A | C | G | U | C | C | C | A | A | U | G | C | G | G | A | A | A | C | C | G | U | G | A |   |   |   |
| 401 | 410 | 420 | 430 | 440 |   |   |   |   |   |   |   |   |   |   |   |   |   |   |   |   |   |   |   |   |   |   |   |   |   |   |   |   |   |   |   |   |   |   |   |
| G   | G   | G   | C   | C   | U | A | G | U | G | C | C | U | C | G | C | A | A | G | A | G | A | G | G | C | U | U | U | U | C | U | C | C |   |   |   |   |   |   |   |
| 441 | 450 | 460 | 470 | 480 |   |   |   |   |   |   |   |   |   |   |   |   |   |   |   |   |   |   |   |   |   |   |   |   |   |   |   |   |   |   |   |   |   |   |   |
| A   | G   | U   | C   | C   | A | G | A | A | A | G | G | U | G | G | A | G | G | A | U | A | A | G | C | C | G | G | G | G | G | C | G | C | A | A | G | A | C | U | G |
| 481 | 490 | 500 | 510 | 520 |   |   |   |   |   |   |   |   |   |   |   |   |   |   |   |   |   |   |   |   |   |   |   |   |   |   |   |   |   |   |   |   |   |   |   |
| U   | G   | U   | C   | A   | G | C | C | G | C | C | G | U | A | A | U | A | C | C | A | G | C | C | C | C | C | C | C | C | C | G | A | G | U | G | A | U | C | G |   |
| 521 | 530 | 540 | 550 | 560 |   |   |   |   |   |   |   |   |   |   |   |   |   |   |   |   |   |   |   |   |   |   |   |   |   |   |   |   |   |   |   |   |   |   |   |
| C   | A   | C   | G   | U   | U | A | U | G | G | C | U | A | A | A | A | G | C | G | C | C | C | G | U | A | G | C | C | G | C | C | U | G | U | A | A |   |   |   |   |
| 561 | 570 | 580 | 590 | 600 |   |   |   |   |   |   |   |   |   |   |   |   |   |   |   |   |   |   |   |   |   |   |   |   |   |   |   |   |   |   |   |   |   |   |   |
| A   | G   | U   | C   | A   | C | C | G | U | U | A | A | A | G | A | C | C | C | G | G | C | U | C | A | A | C | U | C | G | G | G | A | A | C | G | G | C |   |   |   |
| 601 | 610 | 620 | 630 | 640 |   |   |   |   |   |   |   |   |   |   |   |   |   |   |   |   |   |   |   |   |   |   |   |   |   |   |   |   |   |   |   |   |   |   |   |
| C   | G   | U   | G   | A   | U | A | C | A | G | G | C | U | A | G | C | G | G | G | C | G | G | A | G | A | G | G | U | C | G | G | A | G | G | U |   |   |   |   |   |
| 641 | 650 | 660 | 670 | 680 |   |   |   |   |   |   |   |   |   |   |   |   |   |   |   |   |   |   |   |   |   |   |   |   |   |   |   |   |   |   |   |   |   |   |   |
| A   | C   | U   | C   | C   | C | G | G | A | G | U | A | G | G | G | G | C | G | A | A | U | C | C | U | C | A | G | A | U | C | C | C | G | G | A | G | G | A |   |   |
| 681 | 690 | 700 | 710 | 720 |   |   |   |   |   |   |   |   |   |   |   |   |   |   |   |   |   |   |   |   |   |   |   |   |   |   |   |   |   |   |   |   |   |   |   |
| C   | C   | A   | C   | C   | A | G | U | G | G | C | G | A | A | A | G | C | G | U | C | C | G | C | U | A | G | A | A | C | G | C | C | C | G | A | C |   |   |   |   |

Base-Pairing probability color scale

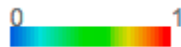

Table S3. Continued

|                                                     |      |      |      |      |
|-----------------------------------------------------|------|------|------|------|
| 721                                                 | 730  | 740  | 750  | 760  |
| G UGAGGGGC G AAAGCCGGG G UAGCAAUA G GAUUA GAUA C    |      |      |      |      |
| 761                                                 | 770  | 780  | 790  | 800  |
| C GUAGUAGU C CCGGCUGUA A ACGAUGCAG G CUAGGUCUC G    |      |      |      |      |
| 801                                                 | 810  | 820  | 830  | 840  |
| C GUAGGCUU U GUGCCUGCC C GGUGCCGCA G GAA AACUGG U   |      |      |      |      |
| 841                                                 | 850  | 860  | 870  | 880  |
| A AGCCCGCC G CCUGGGGAG U ACGGCCGCA A GGCUGAAAC U    |      |      |      |      |
| 881                                                 | 890  | 900  | 910  | 920  |
| U AAAGGA AU U GGC GGGGA G CACCACAAG G GGUGGAACC U   |      |      |      |      |
| 921                                                 | 930  | 940  | 950  | 960  |
| G CCGCUC AA U UGGAGUC AA C GGCUGGA AU C UCACCGGGG G |      |      |      |      |
| 961                                                 | 970  | 980  | 990  | 1000 |
| A GACCCG CAG G AUGACGGCC A GGCUAACGA C CUUGCCAGA C  |      |      |      |      |
| 1001                                                | 1010 | 1020 | 1030 | 1040 |
| U CCGCGAGA G GAGGUGCAU G CCGUCGCC A GCUCGUUU G      |      |      |      |      |
| 1041                                                | 1050 | 1060 | 1070 | 1080 |
| U GAAAU GUC C GGUUAAGUC C GGCAACGAG C GAGACCCCC A   |      |      |      |      |
| 1081                                                | 1090 | 1100 | 1110 | 1120 |
| C UUCUAGUU G GUAACCGUC U CUCCGGAGA C GGUCCACAC U    |      |      |      |      |
| 1121                                                | 1130 | 1140 | 1150 | 1160 |
| A GAAGGACU G CCGGUGUUA A ACCGGAGGA A GGAGGGGGC C    |      |      |      |      |
| 1161                                                | 1170 | 1180 | 1190 | 1200 |
| A CGGCAGGU C AGCAUGCCC C GAAACUJCC G GGCCGCACG C    |      |      |      |      |
| 1201                                                | 1210 | 1220 | 1230 | 1240 |
| G GGUUACAA U GGCAGGGAC A GCGGGAUCC G ACCCCGAGA G    |      |      |      |      |
| 1241                                                | 1250 | 1260 | 1270 | 1280 |
| C GGAAGGCA A UCCACACAAA C CCUGCCUCA G UUGGGAUUG A   |      |      |      |      |
| 1281                                                | 1290 | 1300 | 1310 | 1320 |
| G GGCUGAAA C UCGCCUCUG U GAACGAGGA A UCCCUAGUA A    |      |      |      |      |
| 1321                                                | 1330 | 1340 | 1350 | 1360 |
| C CCGCGGUC A ACAACCCGC G GUGAAUACG U CCCUGCUCU U    |      |      |      |      |
| 1361                                                | 1370 | 1380 | 1390 | 1400 |
| U GCACACAC C GCCCGUCGC U CCACCCGAG U GGAGGGGAA G    |      |      |      |      |
| 1401                                                | 1410 | 1420 | 1430 | 1440 |
| U GAGGCCUC U UGCCCCUCG G GGUGGGAGG U CGAGCUUCU C    |      |      |      |      |
| 1441                                                | 1450 | 1460 | 1470 | 1480 |
| C UCCCGGAG G GGGGAGAAG U CGUAACAAG G UAGCCGUAG G    |      |      |      |      |
| 1481                                                | 1490 | 1500 | 1510 | 1520 |
| G GAACCUUC G GCUUGGAUCA C CUCACA AU                 |      |      |      |      |

Base-Pairing probability color scale

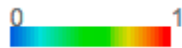

**Table S4. Base-Pairing Probabilities for Msed\_1804.**

Sequence displayed 5' → 3'

|                                                                                 |     |     |     |     |
|---------------------------------------------------------------------------------|-----|-----|-----|-----|
| 1                                                                               | 10  | 20  | 30  | 40  |
| G G G A U G A A A U U C C C U A A G C U A G U C A A G G C U U A C U G C C C C A |     |     |     |     |
| 41                                                                              | 50  | 60  | 70  | 80  |
| A G U G U A A G A C U C A C A C U G A C C A C U C C A U C U C C C U U U A C A A |     |     |     |     |
| 81                                                                              | 90  | 100 | 110 | 120 |
| G G G U G G A A A G A G G A G G G A G A U C G C A G A G G G A C A G C G C A G G |     |     |     |     |
| 121                                                                             | 130 | 140 | 150 | 160 |
| U A C A A C A G G A A G A A C C U A G G U U A C G G A A G C A C A A G G A A G C |     |     |     |     |
| 161                                                                             | 170 | 180 | 190 | 200 |
| C A G U U C C C A A G A G G U U C G C C A A G G U C A C G A A G A A G C A G A C |     |     |     |     |
| 201                                                                             | 210 | 220 | 230 | 240 |
| C C U G A U G U U U A A G U G C C A G A A G U G C G G U U A C A C C U A C U C C |     |     |     |     |
| 241                                                                             | 250 | 260 | 270 | 280 |
| A A G C U A G G G A U G A G G G U A A A G A A G C U C G A A C U A G U U G A G G |     |     |     |     |
| 281                                                                             | 290 |     |     |     |
| U G A U C A A A U G A                                                           |     |     |     |     |

Base-Pairing probability color scale

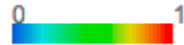

**Table S5. Base-Pairing Probabilities for Msd\_1802.**  
Sequence displayed 5' → 3'

|                                                    |     |     |     |     |
|----------------------------------------------------|-----|-----|-----|-----|
| 1                                                  | 10  | 20  | 30  | 40  |
| G GGAUGAUC U ACAACAGGU A CCCUCUCCC C CGUGAGGGG G   |     |     |     |     |
| 41                                                 | 50  | 60  | 70  | 80  |
| A CAUUCUAA U UGCGACCGU G AAGCAGGUU U UUGAUUACG G   |     |     |     |     |
| 81                                                 | 90  | 100 | 110 | 120 |
| U AGUUAACGU C ACGCUAGAC G AGUAUGGUG G GCUUCAGGC C  |     |     |     |     |
| 121                                                | 130 | 140 | 150 | 160 |
| U UCGUUCGC U GGAGUGAGA U AAGUACCAG G UGGGUUAAG A   |     |     |     |     |
| 161                                                | 170 | 180 | 190 | 200 |
| A CAUAAGGG A CGUGGUAAA G GAGGGAAAGG A AGAUCAUUC U  |     |     |     |     |
| 201                                                | 210 | 220 | 230 | 240 |
| C AAGGUGAU U UAGAGUUGAC C GCAAGAAAG G GUCAGUUGA C  |     |     |     |     |
| 241                                                | 250 | 260 | 270 | 280 |
| G UUUCCCUG A AGAAGGUCA A UGACGACGA U AGGAGGAAG A   |     |     |     |     |
| 281                                                | 290 | 300 | 310 | 320 |
| A GAACGCC C A GUGGAAGAG G AUACAGAA G A UCGACAAGA U |     |     |     |     |
| 321                                                | 330 | 340 | 350 | 360 |
| C CUGGAGAU A GUGGCGCAG A AGCUCAGA A GAGCGAGAA G    |     |     |     |     |
| 361                                                | 370 | 380 | 390 | 400 |
| G AAGCAUGG G AAGCAGGUGG C CUGGAAGCU C GAGGAGAA G U |     |     |     |     |
| 401                                                | 410 | 420 | 430 | 440 |
| A CCGCGACG U GUACGAGGC C CUCCAGAA G G CAUCUAAGG A  |     |     |     |     |
| 441                                                | 450 | 460 | 470 | 480 |
| A GGGGAGAA G GUGCUCUUG G AUGCGGGGG U GCCAGAGAU C   |     |     |     |     |
| 481                                                | 490 | 500 | 510 | 520 |
| U GGAUUAA G C CCAUCCUUG A GGABGGCCAG C AAACACGGG G |     |     |     |     |
| 521                                                | 530 | 540 | 550 | 560 |
| A AAGAGAAGA A GGUUAAGGA G AGCAAAAGUG G UCCUGGUGA A |     |     |     |     |
| 561                                                | 570 | 580 | 590 | 600 |
| G AGCCUGGA C CCUGAUGGU G UGGACAAGA U CAGGAAGGU G   |     |     |     |     |
| 601                                                | 610 | 620 | 630 | 640 |
| U UCGACCUC G AGGAUGAGG G GGACAJAAG G AUAAUUCACG A  |     |     |     |     |
| 641                                                | 650 | 660 | 670 | 680 |
| U UGGUGCCC C AAGGUUAUAG G GUUGAGGUU U CAGGGACC G A |     |     |     |     |
| 681                                                | 690 | 700 | 710 | 720 |
| C CCGAAGGC U GUAGCACAG A GGCUCGAGG A GGUCGUACA G   |     |     |     |     |
| 721                                                | 730 | 740 | 750 | 760 |
| A GGAUACUA G AAGAGGGCAA A AGAGGAGGG C GUUUCAGCG G  |     |     |     |     |
| 761                                                | 770 | 780 | 790 | 800 |
| A GGUUGCCA A AGUGA                                 |     |     |     |     |

Base-Pairing probability color scale

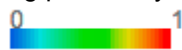

**Table S6. Base-Pairing Probabilities for Msd\_0355.**  
Sequence displayed 5' → 3'

|                                                                                   |     |     |     |     |
|-----------------------------------------------------------------------------------|-----|-----|-----|-----|
| 1                                                                                 | 10  | 20  | 30  | 40  |
| G G G A U G A G U A U A A C C C A G U C U U A U U A C A U G G A U U U A G G A A   |     |     |     |     |
| 41                                                                                | 50  | 60  | 70  | 80  |
| C A C U G A C C C U A G A G A A G G A U C A A G U A A U U A G A A A G U G U A U   |     |     |     |     |
| 81                                                                                | 90  | 100 | 110 | 120 |
| A G C U A U C C U A G G A A U A A G A G G A U C A G G A A A A U C A A A U A C U   |     |     |     |     |
| 121                                                                               | 130 | 140 | 150 | 160 |
| G C G A A A G U G U U C G C U G A G G A A C U C A U C A A G G A G A A A G U U C   |     |     |     |     |
| 161                                                                               | 170 | 180 | 190 | 200 |
| C C C U A G U U A U A G U G G A U C C A G A C G G U G A A U A U A G G G G G C U   |     |     |     |     |
| 201                                                                               | 210 | 220 | 230 | 240 |
| U G A G G C U A U A A U U U U G A U A A A U U U A A C G U U G A U C C A G A G     |     |     |     |     |
| 241                                                                               | 250 | 260 | 270 | 280 |
| G A A G U G G U U A A C C U U C U U A U G G U U G G U A A A A G C G U G G U C C   |     |     |     |     |
| 281                                                                               | 290 | 300 | 310 | 320 |
| U U G A U G U U A A U G A C U G G A A C G A G G A A G U A U U C A A G U U C C U   |     |     |     |     |
| 321                                                                               | 330 | 340 | 350 | 360 |
| G A C C A C C U U C U U C A A C A U C C U U U G G G A G A C U U C C A A G A U U   |     |     |     |     |
| 361                                                                               | 370 | 380 | 390 | 400 |
| U A U A G G A G G G A C A U C U U C G U C C U C C U A G A G G A G G C A C A U G   |     |     |     |     |
| 401                                                                               | 410 | 420 | 430 | 440 |
| A G U U A U C C C C C A G G G A A C A A G A A C C C C G C U U A G C G A C G U     |     |     |     |     |
| 441                                                                               | 450 | 460 | 470 | 480 |
| C U U G G U G A G G A U U G C C C U U C G A G G G A G A A A A G A G G G G G A U U |     |     |     |     |
| 481                                                                               | 490 | 500 | 510 | 520 |
| G G G A U G A U C C U G G U G A G U C A G A G A U C A G C C A A G G U A A A C A   |     |     |     |     |
| 521                                                                               | 530 | 540 | 550 | 560 |
| A G G A U G U C C U U A C C C A G A G C G A G A U C U A U U U C C U C C A C A A   |     |     |     |     |
| 561                                                                               | 570 | 580 | 590 | 600 |
| G G U G G U U C A C C C A G U C G A C G U A A G G G U U U A C A A G G A A A U A   |     |     |     |     |
| 601                                                                               | 610 | 620 | 630 | 640 |
| C U A C C U C U A A A A U C C A G G G A A A U U G A G G C U G A G A U A A A G G   |     |     |     |     |
| 641                                                                               | 650 | 660 | 670 | 680 |
| C C A U G G A A A C U G G A G A U G C G A U A U U U U A C A A G G A U G G G G A   |     |     |     |     |
| 681                                                                               | 690 | 700 | 710 | 720 |
| A C U A A G A A A G G U U A G A A U U A G A A A G U U U G A U G A G U U U C C G   |     |     |     |     |
| 721                                                                               | 730 | 740 | 750 | 760 |
| U C G G U C A U C C A G A G C G G U G A A A A G G C G G A A A U A U A A           |     |     |     |     |

Base-Pairing probability color scale

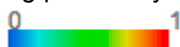

**Table S7. Primers and Ek/LIC vectors used for cloning VapC toxins and PIN domain proteins.**

Displayed sequences 5' → 3'.

| Gene ID   | Annotation | Fwd. primer                                      | Rev. primer                                       | Vector |
|-----------|------------|--------------------------------------------------|---------------------------------------------------|--------|
| Msed_0302 | PIN 1      | GAC GAC GAC AAG ATG ATC<br>TCC TTA CTG CAA G     | GAG GAG AAG CCC GGT TAA<br>TCA ACG AAC TCC AC     | pRSF   |
| Msed_0338 | VapC1      | GAC GAC GAC AAG ATG AGT<br>TAC CTC TTCGAT TC     | GAG GAG AAG CCC GGT TAC<br>CTC TCA ACT TCA TCA AG | pRSF   |
| Msed_0411 | VapC2      | GAC GAC GAC AAG ATG GCG<br>GGA CAG GAA TTG       | GAG GAG AAG CCC GGT CAT<br>ATT ACC TTA TAA TC     | pRSF   |
| Msed_0739 | PIN 2      | GAC GAC GAC AAG ATG GAG<br>AAA GTG ATA TTT G     | GAG GAG AAG CCC GGT CAT<br>TTC CCC CTT TG         | pRSF   |
| Msed_0864 | VapC3      | GAC GAC GAC AAG ATG AGG<br>GTT CTT CTC GAC       | GAG GAG AAG CCC GGC TAG<br>GGC GGG AGA TC         | pRSF   |
| Msed_0899 | VapC4      | GAC GAC GAC AAG ATG GCA<br>AGG TAC GTG ATTG      | GAG GAG AAG CCC GGT CAT<br>TTC CCA AGT G          | pET46  |
| Msed_0908 | VapC5      | GAC GAC GAC AAG ATG GAG<br>AAG GAG AAG TGC CTA G | GAG GAG AAG CCC GGT TAG<br>AGT AGG TCA TCT GAG    | pRSF   |
| Msed_1184 | VapC6      | GAC GAC GAC AAG ATG CAG<br>AAG AAT AAA TAT TTC   | GAG GAG AAG CCC GGT TAT<br>ATC TTG TCA ATT TCA C  | pRSF   |
| Msed_1214 | VapC7      | GAC GAC GAC AAG ATG AGG<br>TTG ATC GTT GAT AC    | GAG GAG AAG CCC GGC TAG<br>CCT GGG CAG            | pRSF   |
| Msed_1245 | VapC8      | GAC GAC GAC AAG ATG CAG<br>AGG ACG CAT ATA G     | GAG GAG AAG CCC GGC TAG<br>ATC GTC TCA AC         | pRSF   |
| Msed_1307 | VapC9      | GAC GAC GAC AAG ATG ATA<br>TTC TTG GAT GCA AAC   | GAG GAG AAG CCC GGT CAC<br>TTT ATC CAG ATC        | pET46  |
| Msed_1385 | VapC10     | GAC GAC GAC AAG ATG AAA<br>TAT TTC GAC ACT AG    | GAG GAG AAG CCC GGC TAT<br>TCC AGT AGG TTT AC     | pET46  |
| Msed_1534 | VapC11     | GAC GAC GAC AAG ATG CAA<br>AGG TAC ATT CTT GAC   | GAG GAG AAG CCC GGC TAG<br>GAA AGA GGT ACA AAG    | pRSF   |
| Msed_2242 | VapC12     | GAC GAC GAC AAG ATG GGG<br>ACA GGT GGT TCT G     | GAG GAG AAG CCC GGC TAA<br>ATA GTG CGA AA         | pRSF   |



**Table S8. Primers used for cloning VapB anti-toxins into pET-46 vector.** The vector was constructed by assembling the gene fragment and vector backbone using Gibson Assembly. Gene specific nucleotides (underlined) vector specific nucleotides (not underlined). Displayed sequences 5' → 3'.

| Gene ID   | Annotation      | Fwd. primer                                                          | Rev. primer                                                             |
|-----------|-----------------|----------------------------------------------------------------------|-------------------------------------------------------------------------|
| Msed_0898 | VapB4           | CAT CAC GTG GAT GAC GAC GAC<br>AAG <u>ATG AGC TGG GTC ACA GTG</u>    | CGG TGG CAG CAG CCT AGG TTA ATT<br><u>AAT CAC GTA CCT TG CC ATC</u>     |
| Msed_1215 | VapB7           | CAT CAC GTG GAT GAC GAC GAC<br>AAG <u>ATG AGC GAC ACA ATC TCC</u>    | CGG TGG CAG CAG CCT AGG TTA ATT<br><u>AAC GAT CAA CCT CAT CCC TAT C</u> |
| Msed_1246 | VapB8           | CAT CAC GTG GAT GAC GAC GAC<br>AAG <u>ATG AGA AAG ACA TTG GTT CG</u> | CGG TGG CAG CAG CCT AGG TTA ATT<br><u>AAC TAC CGC TAT ATG CGT C</u>     |
| pET46     | Vector Backbone | TAA TTA ACC TAG GCT GCT G                                            | CTT GTC GTC GTC ATC CAC                                                 |

**Table S9. MS2 bacteriophage primer name, sequence and location adapted from Zhu et. al. (2008)**

| <b>Location on MS2</b> | <b>ID</b> | <b>Primer sequence (3' → 5')</b> |
|------------------------|-----------|----------------------------------|
| 2026-2007              | M1        | TCTCTATTTATCTGACCGCG             |
| 156-137                | S1        | CCCTATCAAGGGTACTAAA              |
| 3435-3416              | E1        | GAGCACACCCACCCCGTTTA             |
| 3097-3077              | E3        | GGTCCGTCCCACCGAAGAAC             |
| 3231-3212              | E5        | AGAACTTGCGTTCTCGAGCG             |
| 3326-3307              | E6        | TATAACGCGCACGCCGGCGG             |
| 3158-3139              | E4        | CGGAGTCTTGGTGTATACCG             |
| 2621-2602              | E2        | GCGGATACGATCGAGATATG             |
| 2271-2252              | M9        | GCGCACATTGGTCTCGGACC             |
| 2244-2225              | M8        | CCGCTCTCAGAGCGCGGGGG             |
| 1843-1824              | M7        | GCAATTGATTGGTAAATTC              |
| 1915-1896              | M6        | AATTCGTCCCTTAAGTAAGC             |
| 1806-1787              | M5        | GAAGATCAATACATAAAGAG             |
| 1663-1644              | M4        | TGCATTGCCTTAACAATAAG             |
| 1476-1457              | M3        | TACAGGTTACTTTGTAAGCC             |
| 1302-1283              | M2        | GAGCCGTTGCCTGATTAATG             |
| 1140-1121              | S7        | AGCGTCAACGCTTATGATGG             |
| 1078-1061              | S6        | AGCATCCCACGGGGGCCG               |
| 976-957                | S5        | GGTTCAAGATACCTAGAGAC             |
| 859-840                | S4        | GACGGCCATCTAACTTGATG             |
| 511-492                | S3        | CTTCGGTCGACGCCCGGTTC             |
| 86-67                  | S2        | TAGCCATGGTAGCGTCTCGC             |

**Table S10. Primers used in messenger RNA degradation assays.** Upper case indicates gene specific portion while lower case represents the T7 promoter sequence.

| <b>Primer ID</b> | <b>Primer Sequence (5' → 3')</b>            |
|------------------|---------------------------------------------|
| Msed_0355F T7    | taatacgactcactatagggATGAGTATAACCCAGTCTTATTA |
| Msed_0355R       | TTATATTTCCGCCTTTTCAC                        |
| Msed_1538F T7    | taatacgactcactatagggATGGAGGGAGTTTATCTCGT    |
| Msed_1538R       | TCATGTGGAGATCACGATAAATC                     |
| Msed_1802F T7    | taatacgactcactatagggATGATCTACAACAGGTACCCTCT |
| Msed_1802R       | TCACTTGGCAACCTCCGC                          |
| Msed_1804F T7    | taatacgactcactatagggATGAAATTCCTAAGCTAGTCAA  |
| Msed_1804R       | TCATTTGATCACCTCAACTAGTT                     |

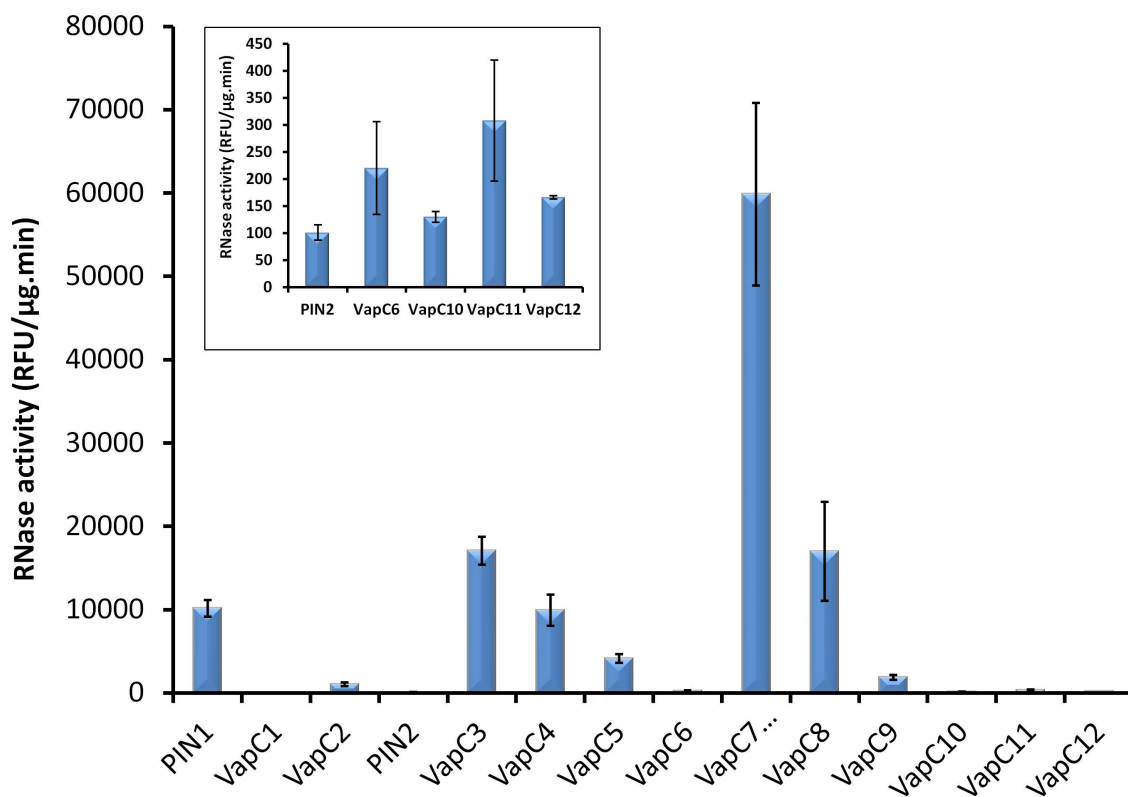

**Figure S1. Initial RNase activity screen of VapC toxins and PIN domain proteins.** RNase activity of VapC Toxins/PIN domain proteins on the generic RNA substrate (IDT DNA) was obtained by calculating initial reaction velocity (increase in fluorescence over time). PIN domain protein (PIN2) and VapC toxins, which had low activity, are shown in the inset. VapC7 had the highest RNase activity ( $598,633 \pm 109,774$  RFU/ $\mu\text{g}\cdot\text{min}$ ); the VapC7 activity has been scaled down by a factor of 10 to be able to represent it along with the other VapCs/PIN domain proteins.

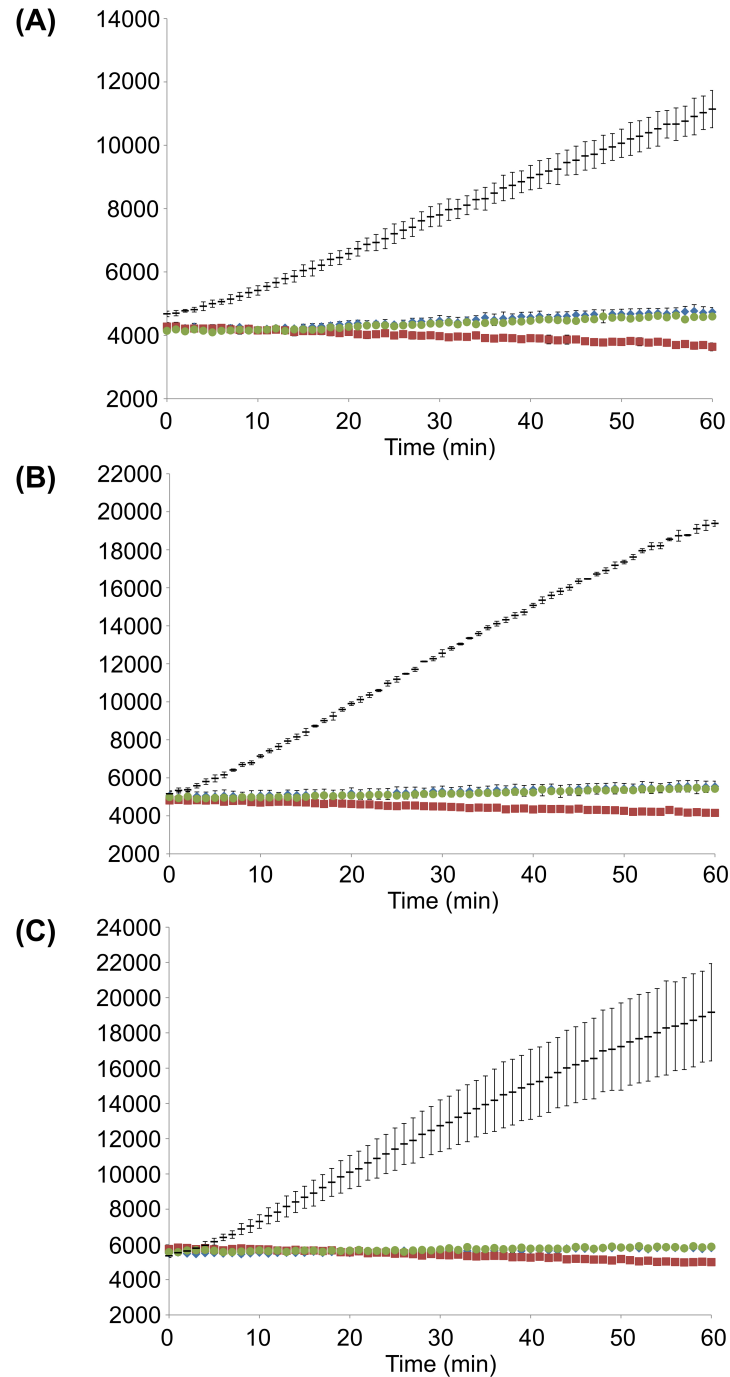

**Figure S2. RNase activity of total RNA degrading VapC toxins.** RNase activity of total RNA degrading VapC toxin proteins using the generic RNA substrate (IDT DNA). The RNA substrated was treated with (A) VapC4 (Msed\_0899), (B) VapC7 (Msed\_1214) and (C) VapC8 (Msed\_1245). VapC4 and VapC8 reactions were loaded with 0.01  $\mu\text{g}$  protein while VapC7 was loaded with 0.001  $\mu\text{g}$  protein. The VapC:VapB mass ratio was 1:2 for all VapCs. No VapC added ( $\blacklozenge$ ); 25 mM EDTA + VapC ( $\blacksquare$ ); VapB + VapC ( $\bullet$ ); VapC ( $-$ ).

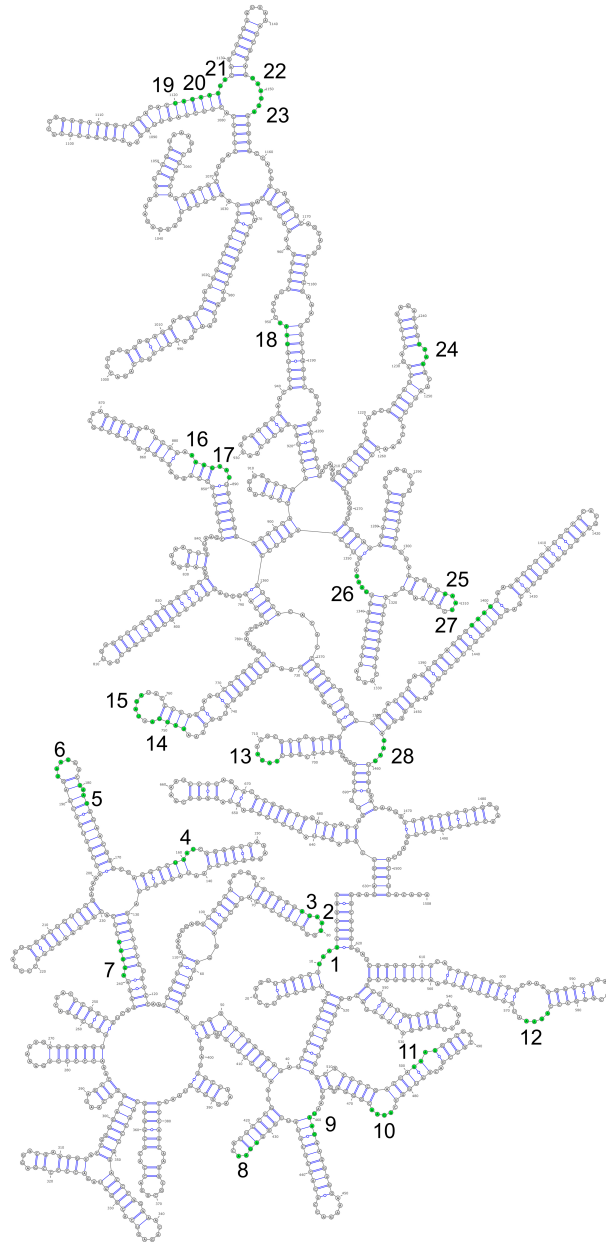

**Figure S3. Predicted secondary structure of *M. sedula*/*M. prunae* 16S rRNA.** The 16S rRNA contains a total of 28 consensus motifs (See **Table 1**), shaded green and indicated by numbers. The RNA structure and base pairing probabilities (see **Table S6**) were determined using RNAfold (<http://rna.tbi.univie.ac.at/>) with default settings followed by drawing in VARNA (<http://varna.lri.fr/>). The structure represents the minimum free energy structure.

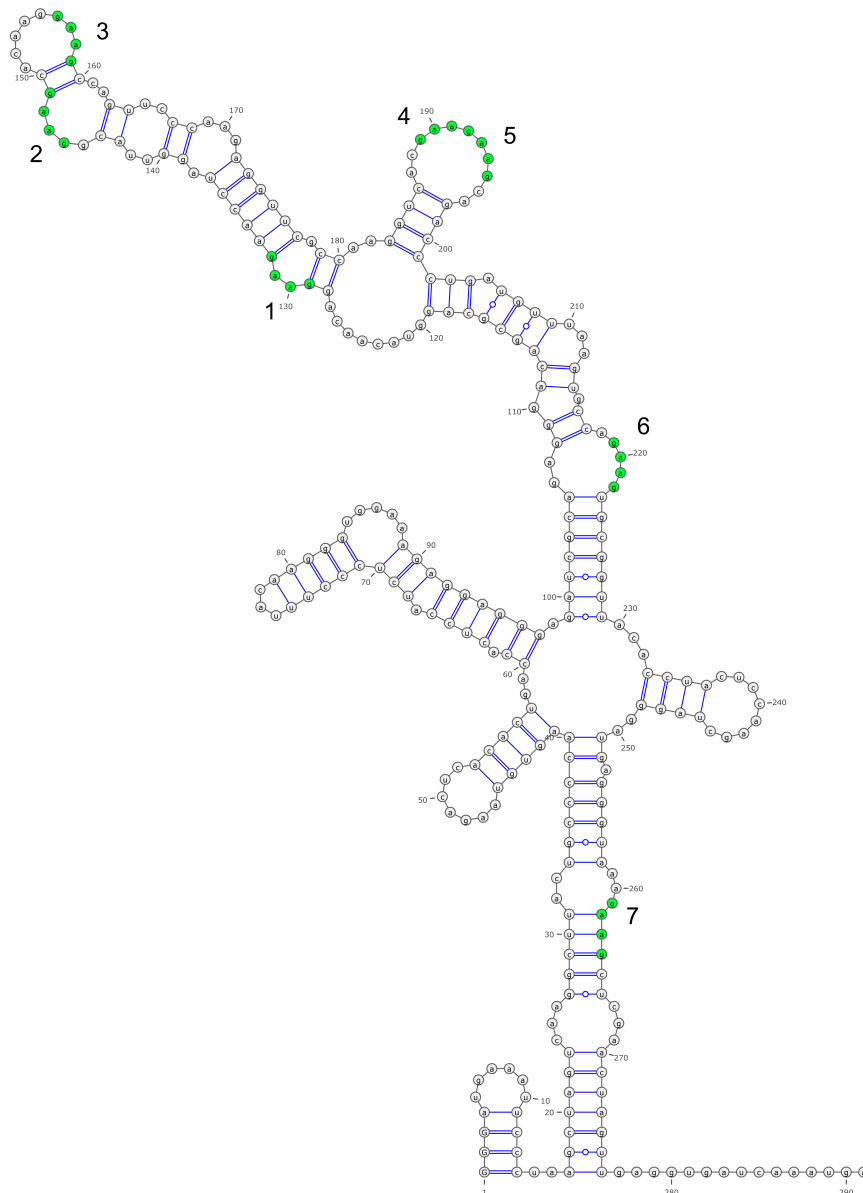

**Figure S4. Predicted secondary structure of Mse\_1804.** Mse\_1804 contains a total of 7 VapC4 (Msed\_0899) consensus motifs (GAAG), shaded green and indicated by numbers. The RNA structure and base pairing probabilities (See **Table S7**) were determined using RNAfold (<http://rna.tbi.univie.ac.at/>) with default settings followed by drawing in VARNA (<http://varna.lri.fr/>). The structure represents the minimum free energy structure. The mRNA molecule includes a GGG at the beginning, runoff from T7 promoter.

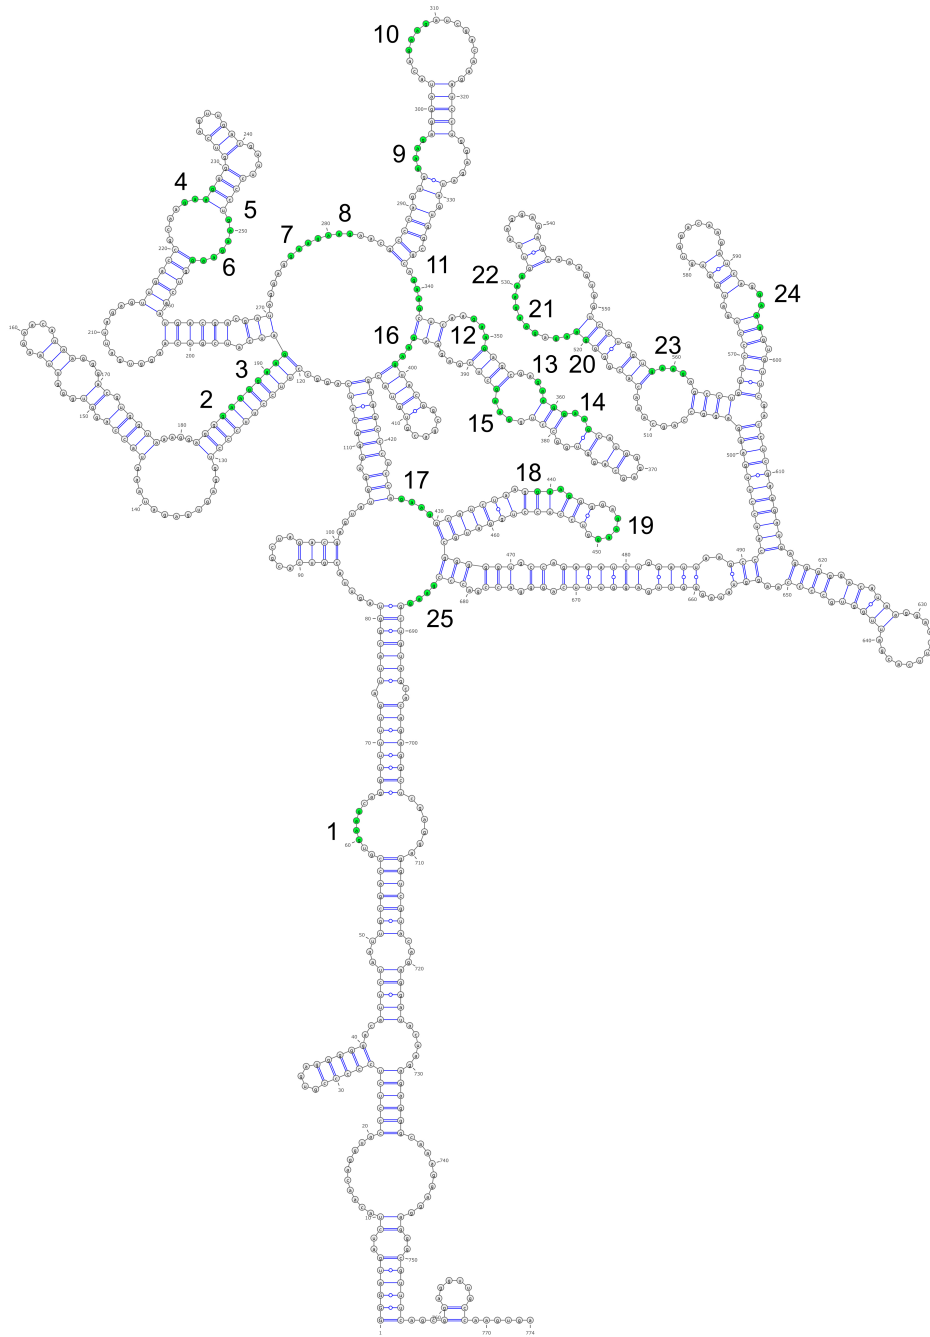

**Figure S5. Predicted secondary structure of Msed\_1802.** Mse\_1802 contains a total of 25 VapC4 (Msed\_0899) consensus motifs (GAAG), shaded green and indicated by numbers. The RNA structure and base pairing probabilities (See **Table S8**) were determined using RNAfold (<http://rna.tbi.univie.ac.at/>) with default settings followed by drawing in VARNA (<http://varna.lri.fr/>). The structure represents the minimum free energy structure. The mRNA molecule includes a GGG at the beginning, runoff from T7 promoter.



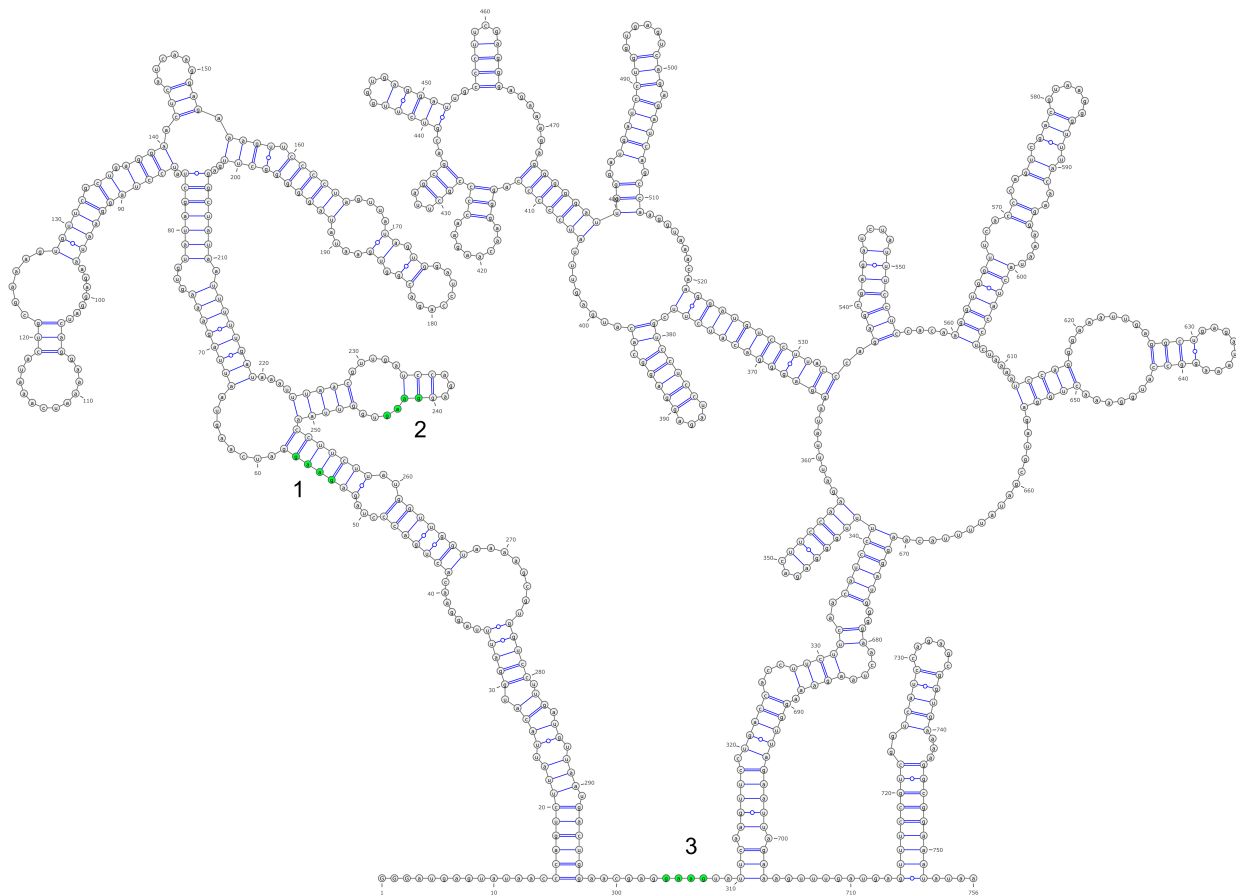

**Figure S6. Predicted secondary structure of Msed\_0355.** Mse\_0355 contains a total of 3 VapC4 (Msed\_0899) consensus motifs (GAAG), shaded green and indicated by numbers. The RNA structure and base pairing probabilities (See **Table S9**) were determined using RNAfold (<http://rna.tbi.univie.ac.at/>) with default settings followed by drawing in VARNA (<http://varna.lri.fr/>). The structure represents the minimum free energy structure. The mRNA molecule includes a GGG at the beginning, runoff from T7 promoter.
